# Supplementary material for: Collagen fiber-reinforced, tough and adaptive conductive organohydrogel e-skin for multimodal sensing applications
Source: Royal Society of Chemistry journal article supplement (doi:10.1039/d4tb00374h), 2024-01-01
Supplement: d4tb00374h1.pdf [file d4tb00374h1.pdf]

1

## Electronic Supporting Information

2 **Collagen fibers-reinforced, tough and adaptive conductive organohydrogel e-skin**  
3 **for multimodal sensing applications**

4 Zhen He<sup>a,b</sup>, Jialu Shen<sup>a,b</sup>, Maohua Lan<sup>a,b</sup>, Haibin Gu<sup>a,b,\*</sup>

5 <sup>a</sup> Key Laboratory of Leather Chemistry and Engineering of Ministry of Education,  
6 Sichuan University, Chengdu 610065, China.

7 <sup>b</sup> National Engineering Laboratory for Clean Technology of Leather Manufacture,  
8 Sichuan University, Chengdu 610065, China.

9 Corresponding author: Haibin Gu, e-mail: guhaibinkong@126.com, orcid.org/0000-  
10 0003-0342-360X.

11

### 12 **Experimental Section**

#### 13 **Materials**

14 Polyvinyl alcohol (PVA, degree of hydrolysis: 95.5-96.5%, molecular weight: 85000-124000  
15 Da), Silver nitrate and Gelatin (Gel) were provided from Chron Chemicals Co., Ltd. (Chengdu,  
16 China). Tara tannin and buffing dust (BD) were purchased from Ting Jiang New Materials Co., Ltd.  
17 (Chengdu, China)

18

#### 19 **Characterization Instruments**

20 UV-vis spectra were recorded by using a UV-vis spectrophotometer (UV1900, Shanghai  
21 Jinghua Technology Co., Ltd.). The infrared (IR) spectra with wavelength range of 500 – 4000 cm<sup>-1</sup>  
22 were analyzed by Fourier Transform infrared (FTIR) spectrometer (Nicolet is 10, Thermo Fisher  
23 Scientific, USA). X-ray photoelectron spectroscopy (XPS) experiments were performed on binding  
24 energies of different elements (C 1s, N 1s, O 1s) by using ESCALAB Xi+ (Thermo Scientific, USA).  
25 The micromorphology of hydrogel was characterized by using a SM-7500 field emission scanning

26 electron microscope (SEM, JEOL, Japan). The morphology BD-CQDs and BD-BD-CQDs@AgNPs were  
27 determined by using transmission electron microscopy (TEM) and high magnification transmission  
28 electron microscopy (HRTEM) (JEM-F200, Japan). The dynamic light scattering (DLS, Zetasizer nano  
29 zip, Britain) were used to analyze the particle sizes and hydraulic diameters of BD-CQDs@AgNPs.

30

### 31 **Mechanical Property Test of Hydrogels**

32 A universal tensile machine (INSTRON5967, USA) was used to determine the mechanical  
33 property of the hydrogel sample. The hydrogel was made into a rectangular sample (40 mm × 6  
34 mm × 2 mm). Then, the sample was stretched at a speed of 100 mm/min to obtain the stress-strain  
35 curve of the hydrogel.

36 The strain ( $\epsilon$ , %) was calculated as follows:

$$37 \quad \epsilon = \frac{l - l_0}{l_0} \times 100$$

38 where  $l$  and  $l_0$  represent the real-time and the original lengths of the test spline, respectively.

39 The stress ( $\sigma$ , MPa) was calculated as follows:

$$40 \quad \sigma = \frac{F}{S}$$

41 where  $F$  indicates the load (N),  $S$  represents the cross-sectional area of the test spline (mm<sup>2</sup>).

42

### 43 **Anti-freezing and Moisturizing Test of Hydrogels**

44 The freezing point of the BPGC hydrogel and the BPGC-Gly organohydrogel were determined  
45 using differential calorimetry scanning (DCS 214, NETZSCH, Germany). The test temperature range  
46 was -60 °C to 20 °C, and the temperature change rate was 5 °C/min.

47 The BPGC hydrogel and the BPGC-Gly organic hydrogel were placed in an environment with  
48 a temperature of 25 °C and relative humidity (RH) of 60%. Then, the mass of the hydrogels with  
49 time was recorded. The weight ratio (WR) of the hydrogels at different times was evaluated by the  
50 following formula :

$$51 \quad WR(\%) = \frac{W_t}{W_0} \times 100\%$$

52 where  $W_0$  (g) is the mass of the original hydrogel and  $W_t$  (g) is the mass of the hydrogel at different  
53 times.

### 54 **Antibacterial Test of Hydrogels**

55 Gram-negative (*Escherichia coli*, *E. coli*, ATCC25922) and Gram-positive (*Staphylococcus*  
56 *aureus*, *S. aureus*, ATCC6538) bacteria were used as test strains. The antibacterial experiments of  
57 hydrogels were performed using the classical disc diffusion method. Specifically, the mother liquor  
58 of *S. aureus* (or *E. coli*) was transferred to the freshly prepared and sterilized Luria-Bertani (LB)  
59 broth nutrient solution, and cultured at 37 °C for 24 h. Then, the activated *S. aureus* (or *E. coli*) was  
60 inoculated onto the sterilized and cooled agar petri dish plate. Finally, the hydrogel discs were  
61 covered on the fixed area of the plate, and the plate was transferred to an incubator with constant  
62 temperature (37°C) and humidity (60%RH) for culture, then the results of the inhibition zone were  
63 observed and recorded after 24 h.

64

#### 65 **Cytotoxicity Test of BPGC-Gly**

66 The cytotoxicity of BPGC-Gly was determined using the 2-(2-methoxy-4-nitrophenyl)-3-(4-  
67 nitrophenyl)-5-(2,4-disulfonic acid benzene)-2h-tetrazolium monosodium salt (CCK-8) method.  
68 L929 cells at logarithmic growth stage were inoculated into 96-well plates at a density of 5,000  
69 cells per well. Subsequently, these cells were cultured for 24 h with different concentrations of  
70 BPGC-Gly extract (0.01, 0.2, 0.4, 0.6, 0.8 and 1.0 mg/mL, respectively). After that, the medium was  
71 removed, and each well was thoroughly cleaned with PBS (phosphate buffer saline, pH 7.4) twice.  
72 100 µL of medium containing 10% CCK-8 and 5% CO<sub>2</sub> was added and cultured for 2 h in an  
73 incubator at 37°C. Finally, the absorbance at 450 nm was measured by a microplate reader.

74

#### 75 **Electrical Property of BPGC-Gly**

76 The conductivity and strain/compression sensing property of BPGC-Gly were tested using an  
77 electrochemical workstation (i-t curve mode, CHI660E, Shanghai Chenhua Instrument Co., Ltd.).  
78 For the electrical performance tests, BPGC-Gly was made into rectangular shapes with a size of 40  
79 mm (length) × 10 mm (width) × 1 mm (thickness). The conductivity ( $\sigma$ , S/m) and relative resistance  
80 changes ( $\Delta R/R_0$  (%)) of BPGC-Gly were calculated according to the following formulas:

$$81 \quad \sigma = \frac{L}{R \times A}$$

82 where the L is the distance between two adjacent probes (m), R represents the resistance of BPGC-  
83 Gly ( $\Omega$ ), and A indicates the cross-sectional area (m<sup>2</sup>).

84 
$$\frac{\Delta R}{R_0} (\%) = \frac{(R - R_0)}{R_0} \times 100$$

85 where  $R_0$  and  $R$  are the resistance without and with applied strain, respectively. During the  
86 electrical tests, the voltage is set to 5 V.

87 The electrical property of BPGC-Gly was also evaluated by using the gauge factor (GF), its  
88 calculation method was reported in the literature, and the known formular is as follows:

89 
$$GF = \frac{(R - R_0)/R_0}{\varepsilon}$$

90 where  $\varepsilon$  represents the tensile strain (%) of BPGC-Gly.

91 BPGC-Gly was made into cylinder shapes with dimensions of 15 mm (diameter)  $\times$  10 mm  
92 (thickness). The conductivity ( $\sigma$ , S/m) and relative resistance changes ( $\Delta R/R_0$  (%)) of BPGC-Gly  
93 were calculated according to the following formulas:

94 Pressure sensitivity ( $S$ ) reflects the influence of pressure on changes in the relative resistance  
95 of the pressure sensor.

96 
$$S = \frac{|\Delta R|/R_0}{P}$$

97 Where  $P$  stands for pressure (kPa).

98

### 99 Sensing Test of BPGC-Gly Sensor

100 The electrical conductivity was determined using an electrochemical workstation (CHI760E,  
101 Chenhua, China). The sensing property of BPGC-Gly was tested by various monitoring modes  
102 (temperature/humidity sensing, strain/pressure-resistance response, and bioelectric signal).  
103 Firstly, BPGC-Gly sample (length: 40 mm, width: 10 mm, thickness: 1 mm) was sealed using 3M  
104 tape and then connected to the electrochemical workstation, the relative conductance ( $\Delta G/G_0$ )  
105 changes in response to different temperatures and humidity were monitored at 1.5 V. Secondly,  
106 BPGC-Gly was made into rectangular shapes with a size of 40 mm (length)  $\times$  10 mm (width)  $\times$  1  
107 mm (thickness) and applied to the surface of human skin with transparent tape. When the  
108 volunteer completed a series of actions (such as frowning, swallowing, finger bending, etc.), the  
109 changes of electric current in real time were record by the electrochemical workstation. According  
110 to these data, the real-time  $\Delta R/R_0$  of different movements can be calculated and signal curve of  
111  $\Delta R/R_0$  vs time can be drawn for the analysis of the monitoring results. Thirdly, BPGC-Gly samples  
112 (15 mm  $\times$  15 mm  $\times$  10 mm) were prepared as a 4  $\times$  4 array of pressure sensors to be used in

113 conjunction with an electrochemical workstation to monitor the pressure distribution of the  
114 weight. Finally, three slices of BPGC-Gly (10 mm × 10 mm × 1 mm) were connected to a customized  
115 multi-channel voltage collection device through wires (red, green, and yellow) as positive, ground,  
116 and reference electrodes, respectively. Three prepared electrodes were directly attached to  
117 different parts (arm, thigh, face, chest and so on) of the volunteer's body. Then, the collected and  
118 recorded data were wirelessly transmitted to the computer through the Bluetooth module (baud  
119 rate 115200).

120

### 121 **Preparation and characterization of BD-CQDs and BD-CQDs@AgNPs**

122 We initially analyzed the microstructure and physicochemical properties of BD-CQDs. As  
123 depicted in Fig. S5b-d, the microstructure of BD-CQDs was observed by TEM and HRTEM. The BD-  
124 CQDs presented uniformly dispersed spherical particles with an average particle size of 5.25 nm.  
125 And the lattice fringes of 0.213 nm could be observed by HRTEM image, which corresponded to  
126 the graphene C (100) plane.<sup>S1</sup> These results proved the successful synthesis of BD-CQDs. As  
127 illustrated in Fig. S5e, the UV-vis spectra of BD-CQDs showed two obvious photo absorption peaks  
128 near 205 nm and 275 nm, belonging to the  $\pi$ - $\pi^*$  electron transition of the C=C double bond and  
129 the  $n$ - $\pi^*$  electron transition of the C=N/C=O bond, respectively.<sup>S2</sup> In addition, according to the  
130 photoluminescent emission spectrum (red line) and photoluminescent excitation spectrum (blue  
131 line), the optimal emission wavelength of 475 nm could be obtained when BD-CQDs was excited  
132 at 400 nm. As shown in the inset of Fig. S5e, the BD-CQDs solution was yellow and transparent  
133 under daylight, and exhibited a blue fluorescence under UV lamps of 365 nm, which was consistent  
134 with the emission spectroscopy results.

135 The composition and structure of BD-CQDs were further analyzed by Fourier transform  
136 infrared (FTIR) and X-ray photoelectron spectrometer (XPS). As shown in the Fig. S5f, Tara tannin  
137 has distinct characteristic vibration peaks at 1721  $\text{cm}^{-1}$  and 1613  $\text{cm}^{-1}$ , respectively, attributed to  
138 the stretching vibrations of the C=C and C=O double bonds in the benzene ring.<sup>S3</sup> Similarly, the  
139 stretching vibration peaks of the amide I band (C=O) and the amide II band (N-H) could be observed  
140 at 1640  $\text{cm}^{-1}$  and 1540  $\text{cm}^{-1}$  respectively in the FTIR of BD.<sup>S4</sup> Notably, the absorption peak of BD-

141 CQDs became significantly stronger in the range of 1664-1340  $\text{cm}^{-1}$ , which was due to the  
142 isomerization of various characteristic groups during the hydrothermal reaction, resulting in a  
143 surge in the number of C=C double bond structures.<sup>55</sup> Meanwhile, all three samples displayed  
144 broad absorption peaks in the range of 3200-3600  $\text{cm}^{-1}$ , which is attributed to the telescopic  
145 vibration peaks of hydroxyl and amino groups, proving that the N- and O-containing functional  
146 groups in Tara tannin and BD were introduced into BD-CQDs, which would be favorable to the  
147 improvement of the reactivity of BD-CQDs.<sup>56</sup> The elemental composition of BD-CQDs was further  
148 explored using XPS. The full spectrum diagram presented in Fig. S5g showed that the BD-CQDs was  
149 mainly composed of C (62.66%), N (11.40%) and O (25.93%) elements. The high-resolution spectra  
150 of the three elements (C, N, and O) were also analyzed to investigate the detailed functional group  
151 composition of BD-CQDs. As illustrated in the Fig. S5h, the C 1s spectrum of the BD-CQDs exhibited  
152 three different peaks at 288.04, 285.87 and 284.53 eV, corresponding to the C=C/C-C, C-O/ C-N  
153 and C=O bonds respectively, demonstrating that BD-CQDs may contain the active groups (amino,  
154 carboxyl and hydroxyl) of Tara tannin and BD.<sup>57</sup> As depicted in Fig. S5i, the N 1s high-resolution  
155 spectra could be deconvoluted to 401.14 eV (C-NH<sub>2</sub>) and 399.56 eV (C-N-C), which further proved  
156 that the N element in BD was successfully doped into BD-CQDs.<sup>58</sup> In addition, C=O double bond  
157 with a binding energy of 531.83 eV as well as C-O bond with a binding energy of 530.84 eV could  
158 be observed by O 1s high-resolution spectra, and these results were consistent with the infrared  
159 spectra (Fig. S5j). Therefore, we believed that the phenolic hydroxyl group in Tara tannin in the  
160 precursor and the amino group, carboxyl group and hydroxyl group in BD were successfully  
161 introduced to the surface of BD-CQDs, which was conducive to the enhancement of the water-  
162 solubility, electrical conductivity and stability of BD-CQDs.

163 Based on the above research, we concluded that BD-CQDs prepared from BD and Tara tannin  
164 could be used as reducing agent and stabilizing agent for the synthesis of AgNPs due to the large  
165 amount of phenolic hydroxyl and active groups (Fig. S6). Typically, AgNO<sub>3</sub> were reduced to AgNPs  
166 by the phenol hydroxyl groups and amino groups on BD-CQDs, while the catechol groups were  
167 oxidized to hemiquinone/quinone.<sup>59</sup> As illustrated in Fig. S1 and S3, the reduced BD-CQDs@AgNPs  
168 solutions under different conditions presented different color changes of light yellow, dark yellow  
169 and brown yellow. As depicted in Fig. S2a and S4a, the redox reaction between silver nitrate and  
170 BD-CQDs could be confirmed by observing surface plasmon resonance (SPR) in the range of 410 –

171 450 nm of BD-CQDs@AgNPs using ultraviolet-visible (UV-Vis) spectroscopy.<sup>S10</sup> The hydrated  
172 particle size and stability of AgNPs that prepared under different pH (6-10) and different AgNO<sub>3</sub>  
173 concentration (0.015M – 0.070M) were analyzed using dynamic light scattering (DLS) and Zeta  
174 potential (ZP). Generally, the smaller PDI means the better solution dispersion. As shown in Fig.  
175 S2, S4 Table S1 and S2, the minimum hydrated particle size (24.41 nm) and PDI (0.277) of AgNPs  
176 were appeared at the condition of pH=8 and AgNO<sub>3</sub> concentration of 0.06M. In addition, the  
177 stability of AgNPs was evaluated by the absolute value of Zeta potential. The greater the absolute  
178 value, the more stable the solution.<sup>S11</sup> As described in Table S1 and S2, the Zeta potential of sample  
179 NO.4 (NO.9) could up to -39.2 mV, indicating that it has good stability. Therefore, according to the  
180 experiments results of DLS and Zeta potential, the NO.9 sample (pH = 8, AgNO<sub>3</sub> concentration of  
181 0.06M) was selected for subsequent experiments (NO.9 sample was named as BD-CQDs@AgNPs).

182 The valence state of Ag elements in BD-CQDs@AgNPs was analyzed by XPS. As shown in Fig.  
183 S5k, the characteristic binding energy of Ag (3d<sub>5/2</sub>) and Ag (3d<sub>3/2</sub>) peaks were observed at 367.18  
184 and 373.18 eV respectively, which clearly demonstrate the presence of metallic silver, indicating  
185 the successful reduction of AgNPs by BD-CQDs.<sup>S12</sup> The microstructure of BD-CQDs@AgNPs was  
186 further examined by using Transmission Electron Microscopy (TEM) and High-Resolution  
187 Transmission Electron Microscopy (HRTEM). As could be seen from Fig. S5l, the shape of BD-  
188 CQDs@AgNPs was spherical with an average particle size of 3.8 nm. Notably, the average particle  
189 size of BD-CQDs@AgNPs obtained by TEM (3.80 nm) was much smaller than the hydrated particle  
190 size (24.41 nm) measured by DLS (Fig. S5m). This is due to the fact that the surface of AgNPs is  
191 negatively charged (ZP = -39.2 mV), which tends to form electrostatic interaction with positively  
192 charged ions in solution, so as to form a stable supramolecular layer on the surface of AgNPs. It is  
193 precisely because of the existence of this supramolecular layer that the hydration particle size of  
194 AgNPs in DLS test is much larger than that in TEM test (TEM only showed the particle size of dried  
195 AgNPs). Meanwhile, the BD-CQDs could be used as stabilizer to gather on the surface of AgNPs,  
196 maintaining the distance between the adjacent AgNPs and preventing their agglomeration. In  
197 addition, the HR-TEM image of BD-CQDs@AgNPs clearly revealed a lattice spacing of 0.35 nm,  
198 corresponding to the (111) crystal plane of AgNPs (Fig. S5n).<sup>S13</sup> All these results strongly confirm  
199 the role of BD-CQDs in the reduction and stabilization of AgNPs. In addition, the conductivity of  
200 BD-CQDs@AgNPs was evaluated by a conductivity meter. As shown in the Fig. S5o, the

201 conductivity of the prepared BD-CQDs could reach 0.71 S/m compared with deionized (DI) water  
202 (0 S/m), and the conductivity of BD-CQDs@AgNPs could reach 0.84 S/m. Simultaneously, the BD-  
203 CQDs@AgNPs could successfully light up the LEDs, indicating that both BD-CQDs and BD-  
204 CQDs@AgNPs have good electrical conductivity (Fig. S5p).

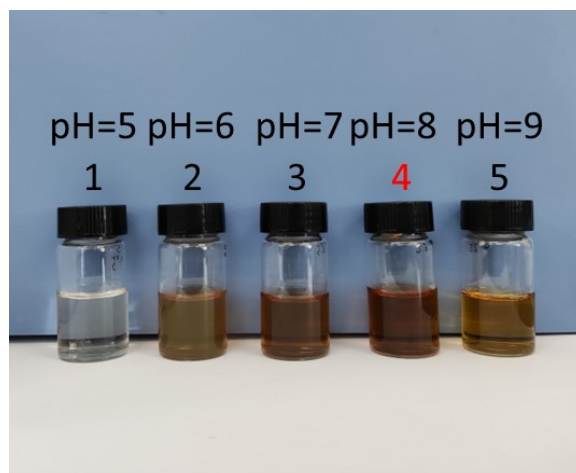

205

206 **Fig. S1** Photos of BD-CQDs@AgNPs solutions prepared under different pH conditions.

207

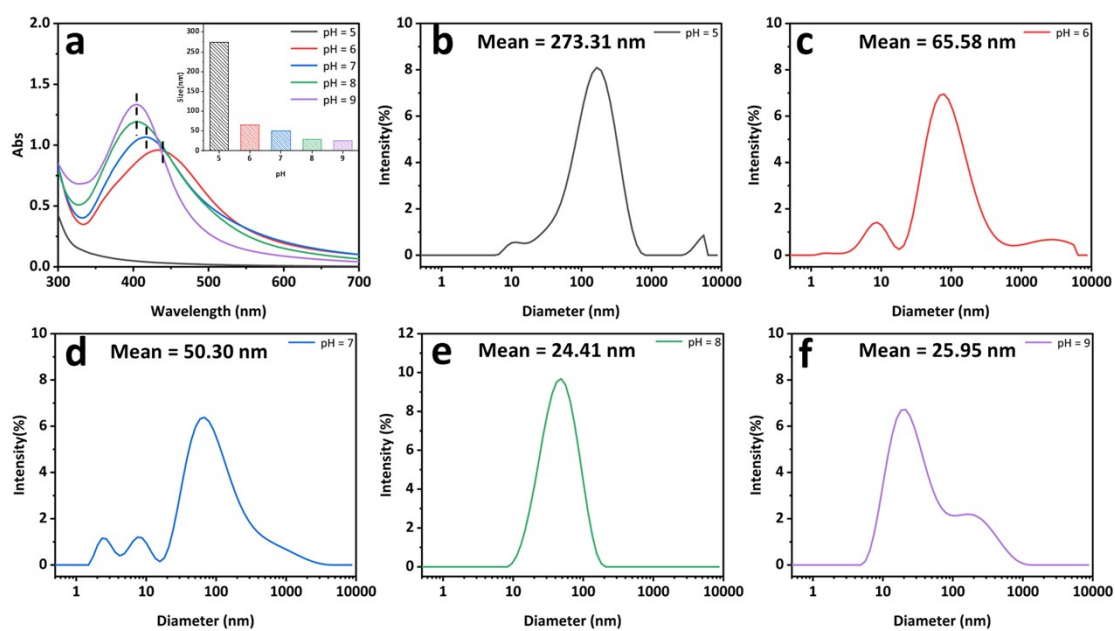

208

209 **Fig. S2** (a) UV-vis spectra (Inset: average particle size diagram) and (b-f) DLS curves of BD-  
210 CQDs@AgNPs solution prepared under different pH conditions.

211



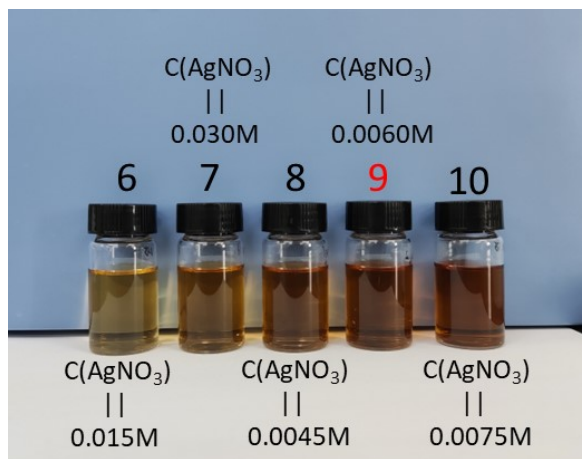

212

213 **Fig. S3** Photos of BD-CQDs@AgNPs solutions prepared under different concentrations of AgNO<sub>3</sub>.

214

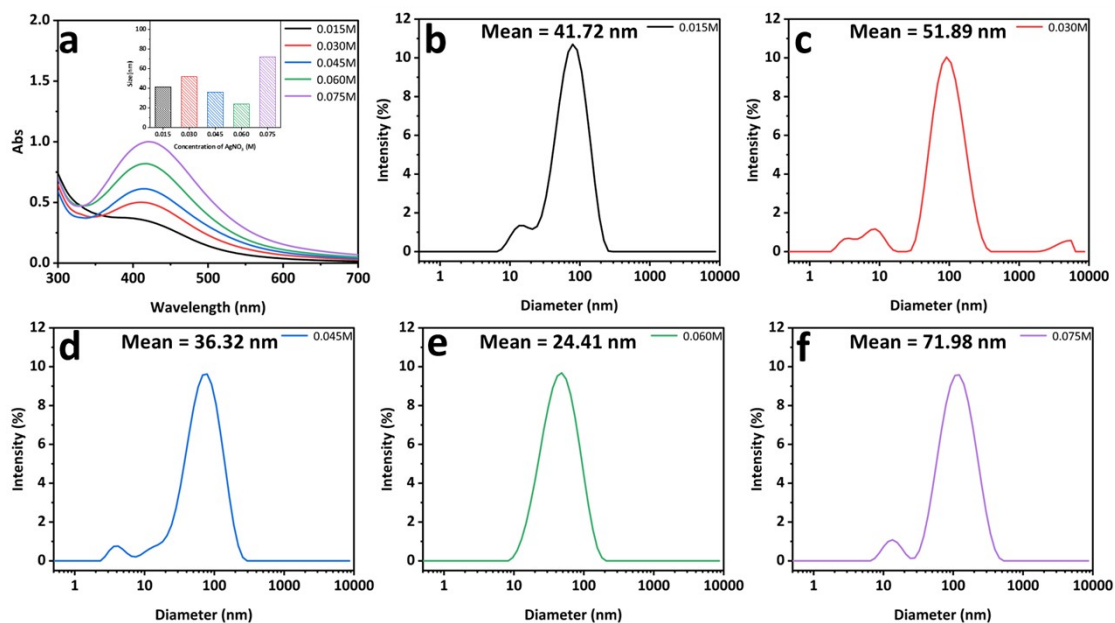

215

216 **Fig. S4** (a) UV-vis spectra (Inset: average particle size diagram) and (b-f) DLS curves of BD-

217 CQDs@AgNPs solution prepared under different concentrations of AgNO<sub>3</sub>.

218

219

220

221

222

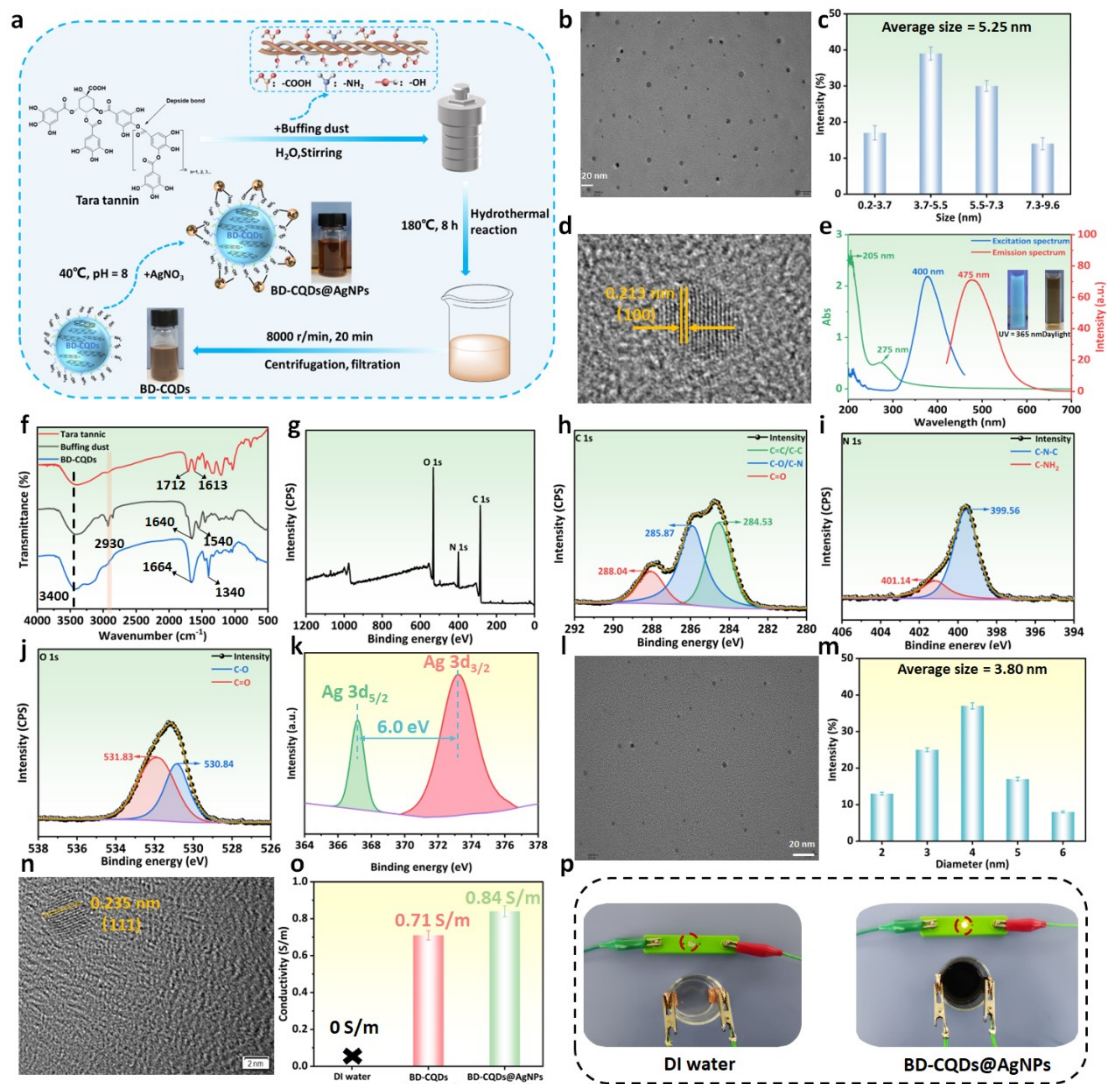

223

224 **Fig. S5** Preparation and characterization of BD-CQDs and CQDs@AgNPs. (a) Schematic illustration  
 225 of the preparation of BD-CQDs and BD-CQDs@AgNPs. TEM image (b), particle size distribution (c),  
 226 and HR-TEM image (d) of BD-CQDs. (e) UV-vis spectrum, excitation spectrum (blue line) and  
 227 emission spectrum (red line) of BD-CQDs (Inset: photos of the BD-CQDs solutions under a 365 nm  
 228 UV lamp (left) and daylight (right)). (f) FTIR spectra of Tara tannin, BD and BD-CQDs. (g) XPS spectra  
 229 of BD-CQDs. High-resolution C 1s (h), N 1s (i) and O 1s (j) spectra of BD-CQDs. (k). High-resolution  
 230 Ag 3d spectrum of BD-CQDs@AgNPs. TEM image (l), particle size distribution (m), and HR-TEM  
 231 image (n) of BD-CQDs@AgNPs. (o) Conductivity of BD-CQDs and BD-CQDs@AgNPs solutions. (p)  
 232 Brightness comparison of LED lamp in DI water and the BD-CQDs@AgNPs solution.

233

234

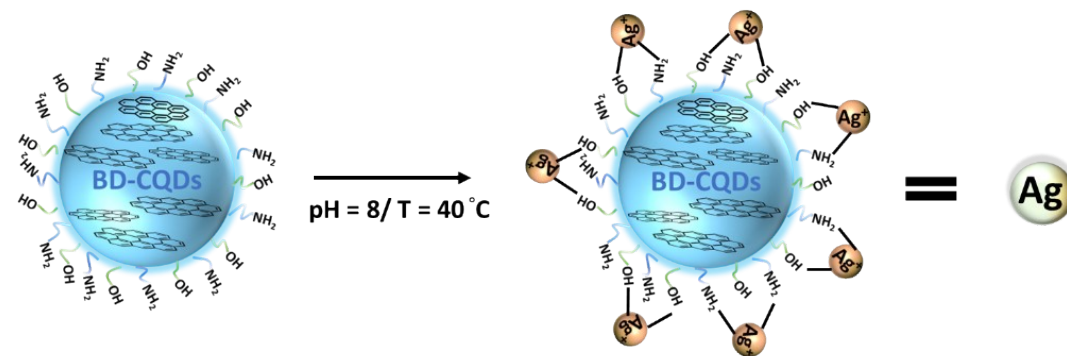

235

236 **Fig. S6** Synthesis schematic diagram of BD-CQDs@AgNPs.

237

238

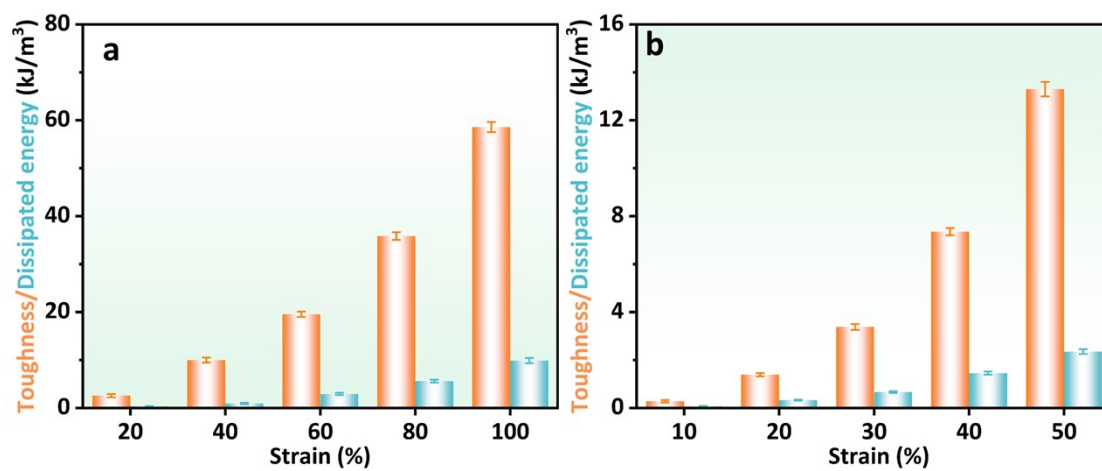

239

240 **Fig. S7** Toughness and dissipated energies of the tensile loading-unloading cycles (a) and the

241 compression loading-unloading cycles (b) of BPGC-Gly at different strains.

242

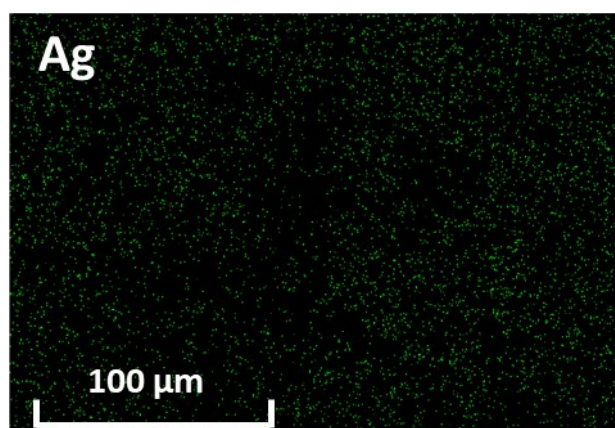

243

244 **Fig. S8** EDS mapping image of Ag elements in the BPGC-Gly.

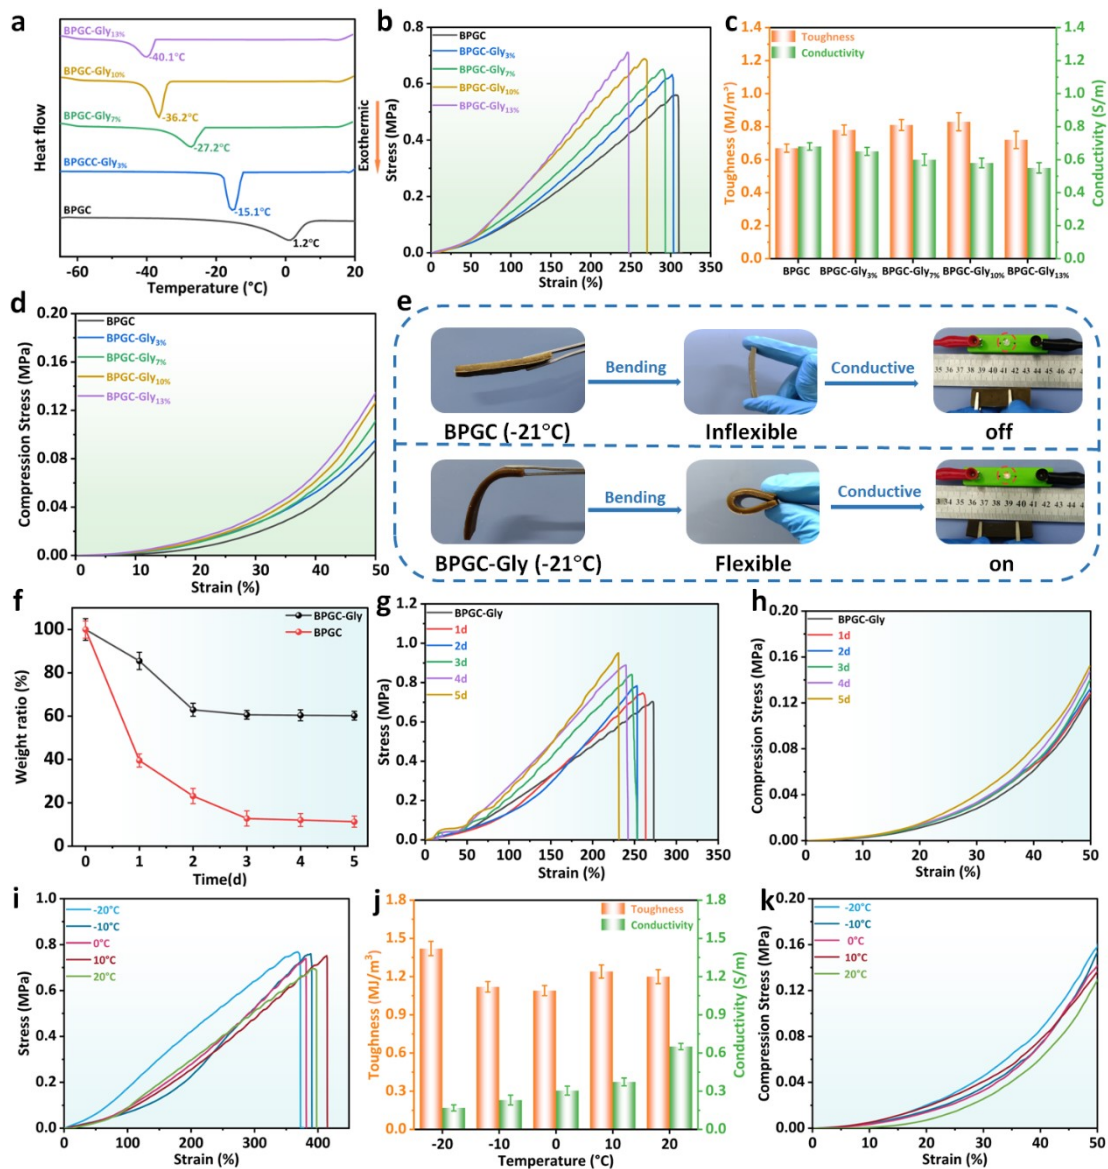

245  
 246 **Fig. S9** Anti-freezing and moisturizing properties of BPGC-Gly. DSC curves (a), stress-strain curves  
 247 (b), tensile toughness and conductivity (c), and compression stress-strain curves (d) of BPGC-Gly  
 248 hydrogels with different Gly contents. e) Pictures of anti-freezing and lighting up LEDs for BPGC  
 249 and BPGC-Gly at  $-21^{\circ}\text{C}$ . f) Moisturizing curves of BPGC and BPGC-Gly after 5 days of placement.  
 250 Stress-strain curves (g) and compression stress-strain curves (h) of BPGC-Gly after 5 days of  
 251 placement. Stress-strain curves (i), tensile toughness and conductivity (j), and compression stress-  
 252 strain curves (k) of BPGC-Gly under different environments.

253  
 254  
 255

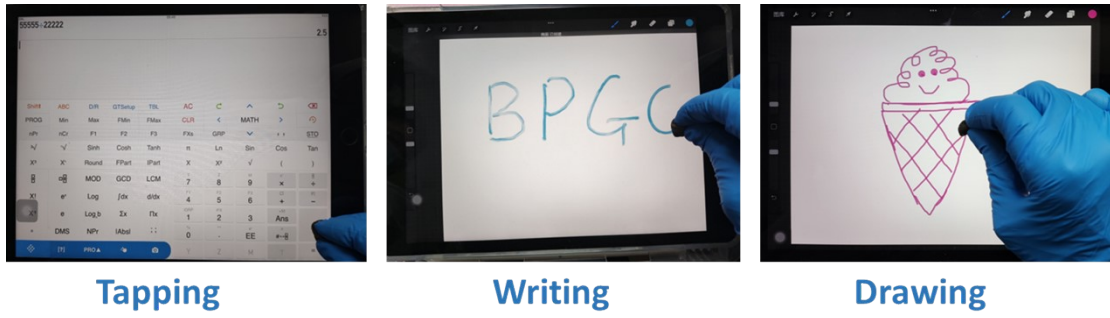

256

257 **Fig. S10** Tapping, writing and drawing patterns on the iPad screen using BPGC hydrogel as a stylus.

258

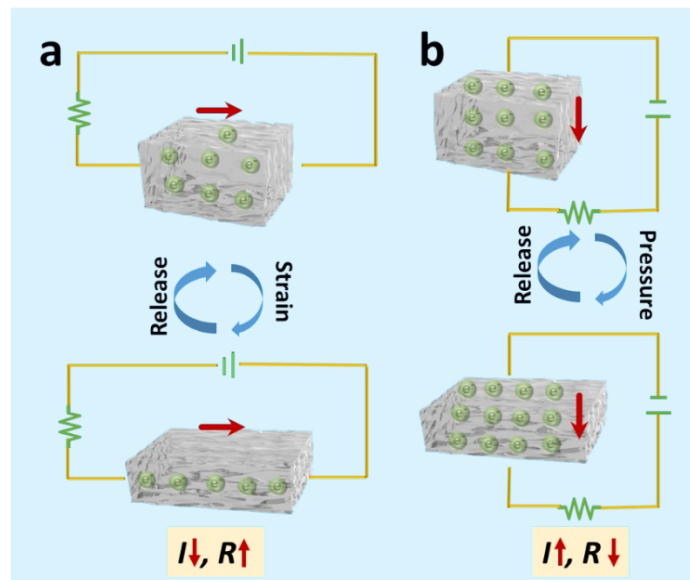

259

260 **Fig. S11** Schematic diagram of the BPGC-Gly strain (a) and pressure sensors (b).

261

262

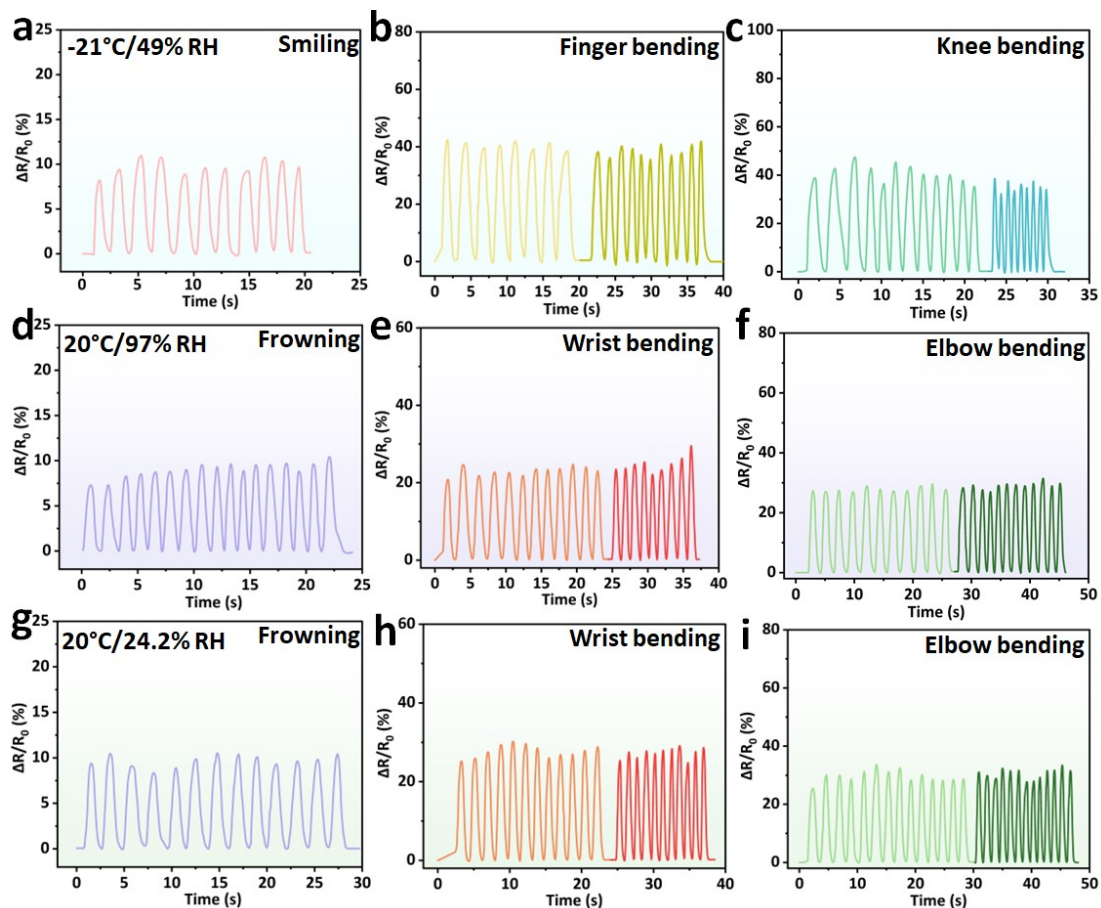

263

264 **Fig. S12** Real-time  $\Delta R/R_0$  change curves of BPGC-Gly strain sensors under different motions

265 (smiling(a), finger bending(b), knee bending(c)) after 60 h of placement at -21 °C with 49% RH.

266 Real-time  $\Delta R/R_0$  change curves of BPGC-Gly strain sensors under different motions (frowning (d),

267 wrist bending (e), elbow bending (f)) after 60 h of placement at 20 °C with 97% RH. Real-time  $\Delta R/R_0$

268 change curves of BPGC-Gly strain sensors under different motions (frowning (g), wrist bending (h),

269 elbow bending (i)) after 60 h of placement at 20°C with 24.2% RH.

270

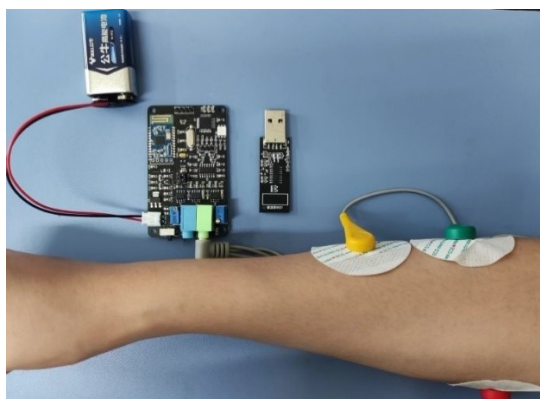

271

272 **Fig. S13** Schematic diagram of bioelectrical signal device wearing

273 **Table S1.** Main components, PDI and Zeta potential of BD-CQDs@AgNPs prepared at different pH  
 274 conditions

| Sample | CQDs<br>(mL) | AgNO <sub>3</sub><br>(0.06M, mL) | pH | T (°C) | PDI   | Zeta potential<br>(mV) |
|--------|--------------|----------------------------------|----|--------|-------|------------------------|
| 1      | 5            | 0.2                              | 5  | 40     | 0.447 | -12.2                  |
| 2      | 5            | 0.2                              | 6  | 40     | 0.552 | -32.1                  |
| 3      | 5            | 0.2                              | 7  | 40     | 0.535 | -31.6                  |
| 4      | 5            | 0.2                              | 8  | 40     | 0.277 | -39.2                  |
| 5      | 5            | 0.2                              | 9  | 40     | 0.418 | -25.1                  |

275

276

277

278 **Table S2.** Main components, PDI and Zeta potential of BD-CQDs@AgNPs prepared at different  
 279 concentrations of AgNO<sub>3</sub>.

| Sample | CQDs<br>(mL) | AgNO <sub>3</sub><br>(mL) | pH | T (°C) | PDI   | Zeta potential<br>(mV) |
|--------|--------------|---------------------------|----|--------|-------|------------------------|
| 6      | 5            | 0.2 (0.015M)              | 8  | 40     | 0.291 | -23.6                  |
| 7      | 5            | 0.2 (0.030M)              | 8  | 40     | 0.421 | -29.1                  |
| 8      | 5            | 0.2 (0.045M)              | 8  | 40     | 0.316 | -33.3                  |

|    |   |              |   |    |       |       |
|----|---|--------------|---|----|-------|-------|
| 9  | 5 | 0.2 (0.060M) | 8 | 40 | 0.277 | -39.2 |
| 10 | 5 | 0.2 (0.075M) | 8 | 40 | 0.308 | -32.1 |

---



**Table S3.** Comparison of sensing type, pressure sensitivity, working range and conductivity of hydrogel pressure sensors.

| Hydrogel network                    | Sensing type | Pressure sensitivity                                                                                                         | Working range | Conductivity (S/m <sup>-1</sup> ) | Ref       |
|-------------------------------------|--------------|------------------------------------------------------------------------------------------------------------------------------|---------------|-----------------------------------|-----------|
| ACC/PAA/alginate                    | Capacitance  | 0.17 kPa <sup>-1</sup>                                                                                                       | 1 kPa         | -                                 | S14       |
| SA/NaCl/PAM                         | Resistance   | 1.45 kPa <sup>-1</sup> (0-1.5 kPa)<br>0.02 kPa <sup>-1</sup> (1.5-100 kPa)                                                   | 100 kPa       | 0.01                              | S15       |
| DCMC/AG/PAA                         | Resistance   | 3.92 kPa <sup>-1</sup> (0–6.9 kPa)<br>0.016 kPa <sup>-1</sup> (6.9–100 kPa)                                                  | 100 kPa       | 3.6                               | S16       |
| PEG/Na <sub>2</sub> SO <sub>4</sub> | Resistance   | 0.006 kPa <sup>-1</sup>                                                                                                      | -             | 0.238                             | S17       |
| OVA/PAM/Fe <sup>3+</sup>            | Resistance   | 2.9 kPa <sup>-1</sup> (0 - 4 kPa)<br>1.66 kPa <sup>-1</sup> (4 - 100 kPa)<br>0.57 kPa <sup>-1</sup> (100 - 320 kPa)          | 320 kPa       | -                                 | S18       |
| PVA/CNTs/graphene                   | Resistance   | 0.127 kPa <sup>-1</sup> (0 - 5 kPa)<br>0.041 kPa <sup>-1</sup> (5 - 10 kPa)                                                  | 10 kPa        | -                                 | S19       |
| PVA/AA                              | Resistance   | 0.841 kPa <sup>-1</sup> (0 - 3 kPa)<br>0.446 kPa <sup>-1</sup> (3 - 10 kPa)<br>0.074 kPa <sup>-1</sup> (10 - 30 kPa)         | 30 kPa        | -                                 | S20       |
| PDA@CNT/PAM                         | Resistance   | 4.16 kPa <sup>-1</sup> (0 -7.9 kPa)                                                                                          | 15kPa         | -                                 | S21       |
| PAA/CNC-g-P(VAm-co-AM)              | Resistance   | 0.0183 kPa <sup>-1</sup> (0 - 75 kPa)<br>0.003kPa <sup>-1</sup> (75 - 150kPa)                                                | 150 kPa       | 0.123                             | S22       |
| BD/PVA/Gel/CQDs                     | Resistance   | 4.26 kPa <sup>-1</sup> (0 – 12.5 kPa)<br>0.86 kPa <sup>-1</sup> (12.5 – 55.5 kPa)<br>0.18 kPa <sup>-1</sup> (55.5 - 125 kPa) |               | 0.70                              | This work |

“-”: indicates no mention in the literature

**Table S4.** Comprehensive performance comparison of BPGC-Gly with previously reported multifunctional hydrogels.

| <b>Sample</b>   | <b>Tensile Stress</b> | <b>Tensile strain</b> | <b>Conductivity (S/m)</b> | <b>GF</b> | <b>S (kPa<sup>-1</sup>)</b> | <b>Multimodal monitoring types</b> | <b>Ref</b> |
|-----------------|-----------------------|-----------------------|---------------------------|-----------|-----------------------------|------------------------------------|------------|
| CPAL            | 1.11 MPa              | 2472%                 | 1.09                      | 2.99      | -                           | 3                                  | 9          |
| PVA/NaCl-P      | 1.60 MPa              | 550%                  | -                         | -         | -                           | 1                                  | 12         |
| PSDM/TWS        | -                     | -                     | -                         | -         | 37.04                       | 3                                  | 23         |
| NSD-Gel         | 7.33 MPa              | 263.1%                | -                         | -         | -                           | 3                                  | 33         |
| PAA/LA-Ag/MXene | 0.30 MPa              | 400%                  | -                         | 9.17      | 0.33                        | 2                                  | 36         |
| PCOBE           | 2.15 MPa              | 880%                  | 7.34                      | 7.0       | -                           | 2                                  | 37         |
| Starch/PAA      | 0.060 MPa             | 135%                  | -                         | 0.98      | 1.57                        | 4                                  | 49         |
| DMAEA/AA        | 0.48 MPa              | 1880%                 | -                         | 15.41     | 0.032                       | 3                                  | 55         |
| BPGC-Gly        | 0.72 MPa              | 270%                  | 0.70                      | 1.33      | 4.26                        | 5                                  | This work  |

“-”: Indicates no mention in the paper.

## References

- S1 J. Shen, Z. He, J. W. Zhang, H. Guo, W. Lin and H. B. Gu, *Polymer*, 2023, **288**, 126471.
- S2 Z. He, J. C. Liu, X. Fan, B. Song and H. B. Gu, *Ind. Eng. Chem. Res.*, 2022, **61**, 17915–17929.
- S3 I.-A. Baragau, N. P. Power, D. J. Morgan, R. A. Lobo, C. S. Roberts, M.-M. Titirici, V. Middelkoop, A. Diaz, S. Dunn and S. Kellici, *ACS Sustain. Chem. Eng.*, 2021, **9**, 2559–2569.
- S4 W. Ulfat, A. Mohyuddin, M. Amjad, M. H. D. Othman, P. Gikas and T. A. Kurniawan, *J. Environ. Manag.*, 2023, **347**, 119129.
- S5 K. M. Qi, Y. P. Ye, B. Wei, M. X. Li, Y. X. Lun, X. Y. Xie and H. J. Xie, *J. Hazard. Mater.*, 2022, **432**, 128759.
- S6 Z. He, J. Shen, J. Zhang, W. Lin and H. Gu, *ACS Sustain. Chem. Eng.*, 2023, **11(35)**, 13126–13141.
- S7 K. Patchai Murugan, S. Sabarinathan, N. Prabhakaran and S. Swarnalatha, *Chem. Eng. J.*, 2023, **468**, 143547.
- S8 J. Liu, F. Zhang, Z. An, W. Shi and H. Li, *RSC Adv.*, 2021, **11(44)**, 27183–27192.
- S9 J. C. Liu, X. Fan, D. Astruc and H. B. Gu, *Collagen & Leather*, 2023, **5(1)**, 17.
- S10 X. Yao, S. Zhang, L. Qian, N. Wei, V. Nica, S. Coseri and F. Han, *Adv. Funct. Mater.*, 2022, **32**, 2204565.
- S11 H. Haidari, R. Bright, X. L. Strudwick, S. Garg, K. Vasilev, A. J. Cowin and Z. Kopecki, *Acta Biomater.*, 2021, **128**, 420–434.
- S12 J. Y. Yang, Y. Chen, L. Zhao, Z. P. Feng, K. L. Peng, A. L. Wei, Y. L. Wang, Z. R. Tong and B. Cheng, *Compos. Pt. B-Eng.*, 2020, **197**, 108139.
- S13 J. L. Lopez-Miranda, M. A. Vázquez González, F. Mares-Briones, J. A. Cervantes-Chávez, R. Esparza, G. Rosas and R. Pérez, *Res. Chem. Intermed.*, 2018, **44**, 7479–7490.
- S14 Z. Lei, Q. Wang, S. Sun, W. Zhu, P. Wu, *Adv. Mater.* 2017, **29 (22)**, 1700321.
- S15 X. Zhang, N. Sheng, L. Wang, Y. Tan, C. Liu, Y. Xia, Z. Nie, K. Sui, *Materials Horizons* 2019, **6 (2)**, 326-333.
- S16 Q. Ling, T. Ke, W. Liu, Z. Ren, L. Zhao, H. Gu, *Ind. Eng. Chem. Res.* 2021, **60 (50)**, 18373-18383.
- S17 S. Zhao, P. Tseng, J. Grasman, Y. Wang, W. Li, B. Napier, B. Yavuz, Y. Chen, L. Howell, J. Rincon, F. G. Omenetto, D. L. Kaplan, *Adv. Mater.* 2018, **30 (25)**, 1800598.
- S18 A. Zheng, Y. Qin, Q. Xia, X. Zhang, Y. Chen, *ACS Applied Polymer Materials* 2023, **5 (4)**, 2312-2322.
- S19 Y. Zhang, E. Ren, A. Li, C. Cui, R. Guo, H. Tang, H. Xiao, M. Zhou, W. Qin, X. Wang, L. Liu, *Journal of Materials Chemistry B* 2021, **9 (3)**, 719-730.
- S20 L. Zhou, Q. Xin, J. Lin, S. Liang, G. Yang, *Applied Materials Today* 2023, **34**, 101907.
- S21 W. He, X. Guo, P. Xia, S. Lu, Y. Zhang, H. Fan, *J. Colloid Interface Sci.* 2023, **647**, 456-466.
- S22 B. Li, Y. Chen, W. Wu, X. Cao, Z. Luo, *Carbohydr. Polym.* 2023, **317**, 121092.
